# Supplementary material for: Biomarkers and Echocardiographic Predictors of Cardiovascular Outcome in Patients With Chronic Chagas Disease
Source: PubMed Central journal article supplement — J Am Heart Assoc. 2023 Jun 14;12(12):e028810. doi: 10.1161/JAHA.122.028810 (PMC10356036; doi:10.1161/jaha.122.028810), 2023-06-14
Supplement: JAH3-12-e028810-s001.pdf [file JAH3-12-e028810-s001.pdf]

# **SUPPLEMENTAL MATERIAL**

**Table S1.** Predictors of the composite event in multivariable analysis models.

| Adjusted Analyses       |                   |                  |                   |                                          |                  |                   |                                          |                  |                   |                                       |                  |                   |
|-------------------------|-------------------|------------------|-------------------|------------------------------------------|------------------|-------------------|------------------------------------------|------------------|-------------------|---------------------------------------|------------------|-------------------|
| Variable                | Model 0<br>n= 359 |                  |                   | Model A – Maximum LA<br>volume<br>n= 354 |                  |                   | Model B – Minimum LA<br>volume<br>n= 354 |                  |                   | Model C - Pre-A LA<br>volume<br>n=336 |                  |                   |
|                         | HR                | 95% CI           | P values          | HR                                       | 95% CI           | P values          | HR                                       | 95% CI           | P values          | HR                                    | 95% CI           | P values          |
| Age, years              | 1.02              | 0.99-1.04        | 0.18              | 1.02                                     | 0.99-1.04        | 0.16              | 1.02                                     | 0.99-1.04        | 0.17              | 1.02                                  | 0.99-1.04        | 0.19              |
| Sex, male               | 0.66              | 0.40-1.09        | 0.10              | 0.68                                     | 0.41-1.11        | 0.12              | 0.68                                     | 0.41-1.12        | 0.13              | <b>0.54</b>                           | <b>0.32-0.94</b> | <b>0.028</b>      |
| LV ejection fraction, % | <b>0.95</b>       | <b>0.93-0.97</b> | <b>&lt;0.0001</b> | <b>0.95</b>                              | <b>0.93-0.97</b> | <b>&lt;0.0001</b> | <b>0.95</b>                              | <b>0.93-0.97</b> | <b>&lt;0.0001</b> | <b>0.95</b>                           | <b>0.92-0.97</b> | <b>&lt;0.0001</b> |
| E/E' ratio              | <b>1.05</b>       | <b>1.01-1.09</b> | <b>0.015</b>      | <b>1.04</b>                              | <b>1.00-1.08</b> | <b>0.039</b>      | <b>1.04</b>                              | <b>1.00-1.08</b> | <b>0.044</b>      | 1.04                                  | 0.99-1.08        | 0.10              |
| RV S', cm/s             | 0.95              | 0.86-1.05        | 0.32              | 0.95                                     | 0.86-1.05        | 0.30              | 0.95                                     | 0.86-1.05        | 0.31              | 1.00                                  | 0.90-1.11        | 0.99              |
| Hypertension            | 0.60              | 0.35-1.02        | 0.058             | <b>0.57</b>                              | <b>0.33-0.97</b> | <b>0.038</b>      | <b>0.57</b>                              | <b>0.33-0.97</b> | <b>0.04</b>       | <b>0.50</b>                           | <b>0.29-0.87</b> | <b>0.014</b>      |
| Cardiac device          | 0.95              | 0.56-1.59        | 0.84              | 0.95                                     | 0.57-1.60        | 0.18              | 0.95                                     | 0.56-1.59        | 0.84              | 0.94                                  | 0.54-1.63        | 0.83              |
| CD cardiac form         | <b>6.69</b>       | <b>1.56-28.7</b> | <b>0.01</b>       | <b>6.42</b>                              | <b>1.49-27.6</b> | <b>0.01</b>       | <b>6.38</b>                              | <b>1.48-27.4</b> | <b>0.01</b>       | <b>6.25</b>                           | <b>1.45-26.9</b> | <b>0.014</b>      |
| Variable of Interest    | -                 | -                | -                 | 1.01                                     | 0.99-1.02        | 0.41              | 1.01                                     | 0.99-1.02        | 0.32              | 1.02                                  | 0.99-1.04        | 0.16              |

CD, Chagas disease; E, peak early wave diastolic filling velocity; E', peak early diastolic mitral annulus velocity; HR, hazard ratio; LA, left atrial; LV, left ventricular; RV, right ventricular; S', peak systolic mitral annulus velocity.

**Table S2.** Predictors of the composite event in multivariable analysis models.

| Adjusted Analyses           |                                                  |                  |               |                                                 |                  |              |                                               |                  |               |                           |                  |                   |
|-----------------------------|--------------------------------------------------|------------------|---------------|-------------------------------------------------|------------------|--------------|-----------------------------------------------|------------------|---------------|---------------------------|------------------|-------------------|
|                             | Model D- 3D LV end-diastolic<br>volume<br>n= 338 |                  |               | Model E – 3D LV end-systolic<br>volume<br>n=338 |                  |              | Model F – 3D LV ejection<br>fraction<br>n=338 |                  |               | Model G - LASct<br>n= 341 |                  |                   |
| Variable                    | HR                                               | 95% CI           | P values      | HR                                              | 95% CI           | P values     | HR                                            | 95% CI           | P values      | HR                        | 95% CI           | P values          |
| Age, years                  | 1.03                                             | 0.99-1.05        | 0.055         | 1.02                                            | 1.00-1.05        | 0.069        | 1.02                                          | 1.00-1.05        | 0.06          | 1.02                      | 1.00-1.05        | 0.09              |
| Sex, male                   | 0.57                                             | 0.32-1.02        | 0.058         | 0.67                                            | 0.38-1.18        | 0.16         | 0.77                                          | 0.45-1.32        | 0.34          | <b>0.58</b>               | <b>0.34-1.00</b> | <b>0.0498</b>     |
| LV ejection fraction, %     | <b>0.95</b>                                      | <b>0.93-0.98</b> | <b>0.0001</b> | <b>0.95</b>                                     | <b>0.93-0.98</b> | <b>0.001</b> | <b>0.94</b>                                   | <b>0.91-0.97</b> | <b>0.0003</b> | <b>0.95</b>               | <b>0.92-0.97</b> | <b>&lt;0.0001</b> |
| E/E' ratio                  | 1.02                                             | 0.97-1.07        | 0.44          | 1.03                                            | 0.99-1.08        | 0.17         | <b>1.05</b>                                   | <b>1.01-1.09</b> | <b>0.02</b>   | 1.03                      | 0.99-1.08        | 0.17              |
| RV S', cm/s                 | 0.96                                             | 0.87-1.06        | 0.40          | 0.95                                            | 0.86-1.05        | 0.35         | 0.94                                          | 0.85-1.05        | 0.29          | 1.03                      | 0.92-1.14        | 0.62              |
| Hypertension                | 0.64                                             | 0.36-1.11        | 0.11          | 0.67                                            | 0.38-1.17        | 0.16         | 0.64                                          | 0.37-1.14        | 0.13          | <b>0.53</b>               | <b>0.31-0.92</b> | <b>0.0249</b>     |
| Cardiac device              | 0.80                                             | 0.45-1.41        | 0.44          | 0.79                                            | 0.45-1.39        | 0.41         | 0.82                                          | 0.46-1.46        | 0.50          | 0.97                      | 0.56-1.67        | 0.91              |
| CD cardiac form             | <b>6.07</b>                                      | <b>1.40-26.2</b> | <b>0.016</b>  | <b>6.14</b>                                     | <b>1.42-26.5</b> | <b>0.015</b> | <b>5.95</b>                                   | <b>1.38-25.7</b> | <b>0.017</b>  | <b>6.21</b>               | <b>1.44-26.8</b> | <b>0.014</b>      |
| <b>Variable of Interest</b> | <b>1.01</b>                                      | <b>1.00-1.02</b> | <b>0.019</b>  | 1.01                                            | 0.99-1.02        | 0.21         | 1.01                                          | 0.97-1.04        | 0.75          | <b>1.09</b>               | <b>1.01-1.18</b> | <b>0.026</b>      |

3D, three dimensional; CD, Chagas disease; E, peak early wave diastolic filling velocity; E', peak early diastolic mitral annulus velocity; HR, hazard ratio; LA, left atrial; LASct, peak negative global LA strain; LV, left ventricular; RV, right ventricular; S', peak systolic mitral annulus velocity.

**Table S3.** Predictors of the composite event in multivariable analysis models.

| <b>Adjusted Analyses</b>    |                       |                  |                   |                       |                  |                 |                         |                  |                 |                         |                  |                 |
|-----------------------------|-----------------------|------------------|-------------------|-----------------------|------------------|-----------------|-------------------------|------------------|-----------------|-------------------------|------------------|-----------------|
| <b>Variable</b>             | <b>Model H- LAScd</b> |                  |                   | <b>Model I – LASr</b> |                  |                 | <b>Model J – LV-GLS</b> |                  |                 | <b>Model K - LV-GCS</b> |                  |                 |
|                             | <b>n= 359</b>         |                  |                   | <b>n= 359</b>         |                  |                 | <b>n= 354</b>           |                  |                 | <b>n= 347</b>           |                  |                 |
|                             | <b>HR</b>             | <b>95% CI</b>    | <b>P values</b>   | <b>HR</b>             | <b>95% CI</b>    | <b>P values</b> | <b>HR</b>               | <b>95% CI</b>    | <b>P values</b> | <b>HR</b>               | <b>95% CI</b>    | <b>P values</b> |
| Age, years                  | 1.02                  | 0.99-1.04        | 0.19              | <b>1.01</b>           | <b>0.99-1.04</b> | <b>0.30</b>     | 1.02                    | 0.99-1.04        | 0.11            | 1.02                    | 0.99-1.04        | 0.16            |
| Sex, male                   | 0.66                  | 0.40-1.09        | 0.11              | 0.67                  | 0.41-1.04        | 0.09            | 0.68                    | 0.41-1.14        | 0.14            | <b>0.61</b>             | <b>0.37-0.99</b> | <b>0.049</b>    |
| LV ejection fraction, %     | <b>0.95</b>           | <b>0.93-0.97</b> | <b>&lt;0.0001</b> | <b>0.95</b>           | <b>0.93-0.98</b> | <b>0.0001</b>   | <b>0.94</b>             | <b>0.91-0.98</b> | <b>0.001</b>    | 0.98                    | 0.95-1.00        | 0.09            |
| E/E' ratio                  | <b>1.05</b>           | <b>1.01-1.09</b> | <b>0.01</b>       | 1.04                  | 0.99-1.08        | 0.05            | <b>1.05</b>             | <b>1.01-1.09</b> | <b>0.019</b>    | 1.04                    | 1.00-1.08        | 0.057           |
| RV S', cm/s                 | 0.95                  | 0.86-1.05        | 0.32              | 0.97                  | 0.87-1.07        | 0.51            | 0.94                    | 0.85-1.05        | 0.28            | 0.98                    | 0.88-1.08        | 0.70            |
| Hypertension                | 0.60                  | 0.35-1.02        | 0.06              | 0.59                  | 0.34-1.00        | 0.049           | <b>0.58</b>             | <b>0.34-0.98</b> | <b>0.04</b>     | 0.71                    | 0.40-1.23        | 0.22            |
| Cardiac device              | 0.95                  | 0.56-1.59        | 0.84              | 0.95                  | 0.57-1.59        | 0.85            | 0.99                    | 0.58-1.70        | 0.99            | 0.86                    | 0.50-1.47        | 0.59            |
| CD cardiac form             | <b>6.70</b>           | <b>1.56-28.7</b> | <b>0.01</b>       | <b>6.38</b>           | <b>1.48-27.4</b> | <b>0.01</b>     | <b>6.43</b>             | <b>1.50-27.6</b> | <b>0.01</b>     | <b>5.74</b>             | <b>1.33-24.7</b> | <b>0.019</b>    |
| <b>Variable of Interest</b> | 1.00                  | 0.93-1.08        | 0.90              | 0.97                  | 0.92-1.02        | 0.24            | 0.98                    | 0.88-1.09        | 0.98            | <b>1.13</b>             | <b>1.04-1.21</b> | <b>0.002</b>    |

CD, Chagas disease; E, peak early wave diastolic filling velocity; E', peak early diastolic mitral annulus velocity; GCS, global circumferential strain; GLS, global longitudinal strain; HR, hazard ratio; LA, left atrial; LAScd, peak positive global LA strain; LASr, total global LA strain; LV, left ventricular; RV, right ventricular; S', peak systolic mitral annulus velocity.

**Table S4.** Predictors of the composite event in multivariable analysis models.

| Adjusted Analyses           |                 |                  |               |                      |                  |                   |                        |                  |               |                   |                  |                   |
|-----------------------------|-----------------|------------------|---------------|----------------------|------------------|-------------------|------------------------|------------------|---------------|-------------------|------------------|-------------------|
| Variable                    | Model L- LV-GRS |                  |               | Model M – Peak Twist |                  |                   | Model N – Peak Torsion |                  |               | Model O - RV-fwLS |                  |                   |
|                             | n= 347          |                  |               | n= 334               |                  |                   | n = 334                |                  |               | n= 337            |                  |                   |
|                             | HR              | 95% CI           | P values      | HR                   | 95% CI           | P values          | HR                     | 95% CI           | P values      | HR                | 95% CI           | P values          |
| Age, years                  | 1.02            | 0.99-1.04        | 0.17          | 1.02                 | 0.99-1.04        | 0.22              | 1.02                   | 0.99-1.04        | 0.19          | 1.02              | 0.99-1.04        | 0.18              |
| Sex, male                   | 0.65            | 0.40-1.08        | 0.10          | 0.66                 | 0.40-1.08        | 0.10              | 0.62                   | 0.38-1.03        | 0.06          | 0.65              | 0.38-1.11        | 0.11              |
| LV ejection fraction, %     | <b>0.95</b>     | <b>0.93-0.98</b> | <b>0.0001</b> | <b>0.95</b>          | <b>0.93-0.98</b> | <b>&lt;0.0001</b> | <b>0.96</b>            | <b>0.94-0.98</b> | <b>0.0002</b> | <b>0.95</b>       | <b>0.93-0.97</b> | <b>&lt;0.0001</b> |
| E/E' ratio                  | <b>1.04</b>     | <b>1.00-1.09</b> | <b>0.027</b>  | 1.04                 | 0.99-1.08        | 0.09              | 1.04                   | 0.99-1.08        | 0.10          | <b>1.05</b>       | <b>1.01-1.10</b> | <b>0.01</b>       |
| RV S', cm/s                 | 0.96            | 0.86-1.06        | 0.43          | 0.95                 | 0.86-1.06        | 0.36              | 0.95                   | 0.86-1.06        | 0.35          | 0.95              | 0.86-1.06        | 0.38              |
| Hypertension                | <b>0.58</b>     | <b>0.34-1.00</b> | <b>0.049</b>  | 0.71                 | 0.41-1.25        | 0.24              | 0.72                   | 0.41-1.27        | 0.26          | 0.58              | 0.33-1.02        | 0.057             |
| Cardiac device              | 0.91            | 0.53-1.56        | 0.73          | 0.83                 | 0.48-1.44        | 0.51              | 0.81                   | 0.47-1.42        | 0.47          | 1.04              | 0.60-1.80        | 0.90              |
| CD cardiac form             | <b>6.45</b>     | <b>1.50-27.8</b> | <b>0.01</b>   | <b>5.08</b>          | <b>1.17-22.0</b> | <b>0.03</b>       | <b>4.86</b>            | <b>1.12-21.1</b> | <b>0.03</b>   | <b>12.2</b>       | <b>1.63-91.9</b> | <b>0.01</b>       |
| <b>Variable of Interest</b> | 0.99            | 0.97-1.02        | 0.67          | <b>0.94</b>          | <b>0.90-0.99</b> | <b>0.02</b>       | <b>0.56</b>            | <b>0.37-0.85</b> | <b>0.006</b>  | 0.97              | 0.92-1.02        | 0.23              |

CD, Chagas disease; E, peak early wave diastolic filling velocity; E', peak early diastolic mitral annulus velocity; GRS, global radial strain; HR, hazard ratio; LV, left ventricular; RV, right ventricular; RV-fwLS, RV free wall longitudinal strain; S', peak systolic mitral annulus velocity.

**Table S5.** Predictors of the composite event in multivariable analysis models.

| Variable                    | Adjusted Analyses   |                  |               |               |                  |                   |                  |                  |               |               |                  |                   |
|-----------------------------|---------------------|------------------|---------------|---------------|------------------|-------------------|------------------|------------------|---------------|---------------|------------------|-------------------|
|                             | Model P- Troponin I |                  |               | Model Q – BNP |                  |                   | Model R – TGF-β1 |                  |               | Model S - TNF |                  |                   |
|                             | n= 315              |                  |               | n= 335        |                  |                   | n = 313          |                  |               | n= 329        |                  |                   |
|                             | HR                  | 95% CI           | P values      | HR            | 95% CI           | P values          | HR               | 95% CI           | P values      | HR            | 95% CI           | P values          |
| Age, years                  | 1.02                | 0.99-1.04        | 0.16          | 1.01          | 0.99-1.04        | 0.29              | 1.01             | 0.99-1.04        | 0.28          | 1.01          | 0.99-1.04        | 0.23              |
| Sex, male                   | 0.70                | 0.41-1.17        | 0.17          | 0.68          | 0.41-1.13        | 0.14              | 0.73             | 0.43-1.25        | 0.25          | 0.65          | 0.39-1.08        | 0.10              |
| LV ejection fraction, %     | <b>0.96</b>         | <b>0.93-0.98</b> | <b>0.0001</b> | <b>0.95</b>   | <b>0.93-0.97</b> | <b>&lt;0.0001</b> | <b>0.95</b>      | <b>0.93-0.98</b> | <b>0.0001</b> | <b>0.95</b>   | <b>0.93-0.97</b> | <b>&lt;0.0001</b> |
| E/E' ratio                  | <b>1.05</b>         | <b>1.00-1.10</b> | <b>0.03</b>   | 1.04          | 1.00-1.08        | 0.06              | <b>1.05</b>      | <b>1.00-1.10</b> | <b>0.03</b>   | <b>1.05</b>   | <b>1.01-1.09</b> | <b>0.01</b>       |
| RV S', cm/s                 | 0.94                | 0.85-1.04        | 0.25          | 0.93          | 0.84-1.02        | 0.13              | 0.94             | 0.84-1.05        | 0.26          | 0.96          | 0.86-1.06        | 0.40              |
| Hypertension                | 0.59                | 0.34-1.02        | 0.058         | 0.72          | 0.42-1.23        | 0.23              | 0.69             | 0.40-1.21        | 0.20          | 0.63          | 0.37-1.08        | 0.10              |
| Cardiac device              | 1.00                | 0.58-1.70        | 0.99          | 0.85          | 0.50-1.44        | 0.55              | 0.86             | 0.49-1.50        | 0.59          | 0.90          | 0.53-1.53        | 0.70              |
| CD cardiac form             | <b>6.51</b>         | <b>1.51-28.0</b> | <b>0.01</b>   | <b>6.85</b>   | <b>1.60-29.3</b> | <b>0.009</b>      | <b>6.84</b>      | <b>1.59-29.4</b> | <b>0.0097</b> | <b>7.05</b>   | <b>1.65-30.2</b> | <b>0.008</b>      |
| <b>Variable of Interest</b> | 0.99                | 0.83-1.16        | 0.88          | 1.94          | 0.99-3.82        | 0.05              | 0.99             | 0.97-1.01        | 0.51          | 1.02          | 0.97-1.06        | 0.48              |

BNP, brain natriuretic peptide; CD, Chagas disease; E, peak early wave diastolic filling velocity; E', peak early diastolic mitral annulus velocity; HR, hazard ratio; LV, left ventricular; RV, right ventricular; S', peak systolic mitral annulus velocity; TGF-β1, transforming growth factor β1; TNF, tumor necrosis factor.

**Table S6.** Predictors of the composite event in multivariable analysis models.

| Adjusted Analyses           |                |                  |                   |                |                  |                   |                               |                  |                   |                          |                  |                   |
|-----------------------------|----------------|------------------|-------------------|----------------|------------------|-------------------|-------------------------------|------------------|-------------------|--------------------------|------------------|-------------------|
| Variable                    | Model T- MMP-2 |                  |                   | Model U- MMP-9 |                  |                   | Model V – <i>T. cruzi</i> PCR |                  |                   | Model X – Parasitic load |                  |                   |
|                             | n= 335         |                  |                   | n= 332         |                  |                   | n= 331                        |                  |                   | n = 331                  |                  |                   |
|                             | HR             | 95% CI           | P values          | HR             | 95% CI           | P values          | HR                            | 95% CI           | P values          | HR                       | 95% CI           | P values          |
| Age, years                  | 1.01           | 0.99-1.04        | 0.28              | 1.01           | 0.99-1.04        | 0.28              | 1.03                          | 0.99-1.06        | 0.06              | 1.02                     | 1.00-1.05        | 0.07              |
| Sex, male                   | 0.64           | 0.39-1.07        | 0.09              | 0.67           | 0.41-1.12        | 0.13              | 0.75                          | 0.44-1.26        | 0.27              | 0.72                     | 0.42-1.21        | 0.21              |
| LV ejection fraction, %     | <b>0.95</b>    | <b>0.93-0.97</b> | <b>&lt;0.0001</b> | <b>0.95</b>    | <b>0.93-0.97</b> | <b>&lt;0.0001</b> | <b>0.94</b>                   | <b>0.92-0.96</b> | <b>&lt;0.0001</b> | <b>0.95</b>              | <b>0.93-0.97</b> | <b>&lt;0.0001</b> |
| E/E' ratio                  | 1.05           | 1.01-1.09        | 0.018             | 1.05           | 1.01-1.09        | 0.02              | 1.04                          | 1.00-1.08        | 0.07              | 1.04                     | 0.99-1.08        | 0.08              |
| RV S', cm/s                 | 0.95           | 0.86-1.04        | 0.27              | 0.95           | 0.86-1.05        | 0.32              | 0.95                          | 0.86-1.05        | 0.33              | 0.95                     | 0.86-1.05        | 0.30              |
| Hypertension                | 0.64           | 0.37-1.08        | 0.09              | 0.65           | 0.38-1.12        | 0.12              | 0.59                          | 0.34-1.02        | 0.06              | <b>0.57</b>              | <b>0.33-0.99</b> | <b>0.048</b>      |
| Cardiac device              | 0.89           | 0.52-1.50        | 0.65              | 0.93           | 0.54-1.60        | 0.79              | 0.77                          | 0.43-1.37        | 0.38              | 0.84                     | 0.47-1.49        | 0.55              |
| CD cardiac form             | <b>6.79</b>    | <b>1.59-29.0</b> | <b>0.0098</b>     | <b>6.85</b>    | <b>1.60-29.3</b> | <b>0.009</b>      | <b>6.04</b>                   | <b>1.41-26.0</b> | <b>0.02</b>       | <b>6.59</b>              | <b>1.53-28.3</b> | <b>0.01</b>       |
| <b>Variable of Interest</b> | 1.01           | 0.97-1.06        | 0.51              | 1.02           | 0.94-1.07        | 0.95              | <b>1.77</b>                   | <b>1.09-2.86</b> | <b>0.02</b>       | 1.01                     | 0.98-1.03        | 0.55              |

CD, Chagas disease; E, peak early wave diastolic filling velocity; E', peak early diastolic mitral annulus velocity; HR, hazard ratio; LV, left ventricular; MMP, matrix metalloproteinase; PCR, polymerase chain reaction; RV, right ventricular; S', peak systolic mitral annulus velocity; *T. cruzi*, *Trypanosoma cruzi*.

**Table S7.** Predictors of the composite event in multivariable analysis models adjusted for competing risks.

| Variable                    | Adjusted Analyses          |                  |                  |             |                  |                  |             |                  |              |             |                  |                  |
|-----------------------------|----------------------------|------------------|------------------|-------------|------------------|------------------|-------------|------------------|--------------|-------------|------------------|------------------|
|                             | 3D LV end-diastolic volume |                  |                  | LASct       |                  |                  | LV-GCS      |                  |              | Peak Twist  |                  |                  |
|                             | n= 338                     |                  |                  | n= 341      |                  |                  | n= 347      |                  |              | n= 334      |                  |                  |
|                             | HR                         | 95% CI           | P values         | HR          | 95% CI           | P values         | HR          | 95% CI           | P values     | HR          | 95% CI           | P values         |
| Age, years                  | 1.01                       | 0.99-1.04        | 0.31             | <b>1.01</b> | <b>1.00-1.17</b> | <b>0.04</b>      | 1.01        | 0.98-1.03        | 0.63         | 1.01        | 0.98-1.03        | 0.60             |
| Sex, male                   | 0.56                       | 0.31-1.02        | 0.059            | 0.58        | 0.34-1.00        | 0.051            | 0.61        | 0.36-1.03        | 0.067        | 0.65        | 0.39-1.06        | 0.09             |
| LV ejection fraction, %     | <b>0.96</b>                | <b>0.94-0.98</b> | <b>&lt;0.001</b> | <b>0.95</b> | <b>0.93-0.97</b> | <b>&lt;0.001</b> | 0.98        | 0.95-1.00        | 0.08         | <b>0.96</b> | <b>0.94-0.98</b> | <b>&lt;0.001</b> |
| E/E' ratio                  | 1.02                       | 0.97-1.07        | 0.36             | <b>1.04</b> | <b>1.00-1.08</b> | <b>0.049</b>     | <b>1.04</b> | <b>1.00-1.08</b> | <b>0.03</b>  | 1.04        | 1.00-1.08        | 0.06             |
| RV S', cm/s                 | 0.95                       | 0.86-1.06        | 0.38             | 1.01        | 0.93-1.11        | 0.76             | 0.98        | 0.87-1.10        | 0.68         | 0.95        | 0.85-1.06        | 0.37             |
| Hypertension                | 0.75                       | 0.43-1.29        | 0.43             | 0.66        | 0.38-1.15        | 0.14             | 0.83        | 0.45-1.52        | 0.54         | 0.82        | 0.47-1.45        | 0.50             |
| Cardiac device              | 0.74                       | 0.41-1.32        | 0.31             | 0.89        | 0.52-1.54        | 0.69             | 0.81        | 0.47-1.38        | 0.44         | 0.76        | 0.44-1.34        | 0.35             |
| CD cardiac form             | <b>6.17</b>                | <b>1.39-27.3</b> | <b>0.017</b>     | <b>6.39</b> | <b>1.45-28.2</b> | <b>0.014</b>     | <b>5.86</b> | <b>1.31-26.3</b> | <b>0.02</b>  | <b>5.06</b> | <b>1.10-23.3</b> | <b>0.037</b>     |
| <b>Variable of Interest</b> | <b>1.01</b>                | <b>1.00-1.02</b> | <b>0.024</b>     | <b>1.08</b> | <b>1.00-1.17</b> | <b>0.04</b>      | <b>1.12</b> | <b>1.04-1.21</b> | <b>0.003</b> | <b>0.94</b> | <b>0.89-0.99</b> | <b>0.01</b>      |

3D, three-dimensional; CD, Chagas disease; E, peak early wave diastolic filling velocity; E', peak early diastolic mitral annulus velocity; GCS, global circumferential strain; HR, hazard ratio; LA, left atrial; LASct, peak negative global LA strain; LV, left ventricular; RV, right ventricular; S', peak systolic mitral annulus velocity.



**Table S8.** Predictors of the composite event in multivariable analysis models adjusted for competing risks.

| Variable                    | Adjusted Analyses |                  |                  |             |                  |                  |                     |                  |                  |
|-----------------------------|-------------------|------------------|------------------|-------------|------------------|------------------|---------------------|------------------|------------------|
|                             | Peak Torsion      |                  |                  | BNP         |                  |                  | <i>T. cruzi</i> PCR |                  |                  |
|                             | n = 334           |                  |                  | n= 335      |                  |                  | n= 331              |                  |                  |
|                             | HR                | 95% CI           | P values         | HR          | 95% CI           | P values         | HR                  | 95% CI           | P values         |
| Age, years                  | 1.01              | 0.98-1.03        | 0.54             | 1.00        | 0.98-1.03        | 0.75             | 1.02                | 0.99-1.04        | 0.18             |
| Sex, male                   | 0.61              | 0.37-1.03        | 0.057            | 0.69        | 0.41-1.15        | 0.15             | 0.80                | 0.48-1.33        | 0.39             |
| LV ejection fraction, %     | <b>0.95</b>       | <b>0.94-0.98</b> | <b>&lt;0.001</b> | <b>0.95</b> | <b>0.93-0.97</b> | <b>&lt;0.001</b> | <b>0.95</b>         | <b>0.93-0.97</b> | <b>&lt;0.001</b> |
| E/E' ratio                  | 1.04              | 1.00-1.08        | 0.066            | <b>1.04</b> | <b>1.01-1.08</b> | <b>0.02</b>      | <b>1.04</b>         | <b>1.01-1.08</b> | <b>0.02</b>      |
| RV S', cm/s                 | 0.95              | 0.85-1.06        | 0.37             | 0.92        | 0.83-1.02        | 0.10             | 0.95                | 0.85-1.05        | 0.28             |
| Hypertension                | 0.83              | 0.47-1.47        | 0.53             | 0.85        | 0.50-1.43        | 0.54             | 0.67                | 0.39-1.15        | 0.14             |
| Cardiac device              | 0.75              | 0.43-1.32        | 0.32             | 0.80        | 0.47-1.36        | 0.41             | 0.76                | 0.44 -1.33       | 0.34             |
| CD cardiac form             | <b>4.85</b>       | <b>1.05-22.4</b> | <b>0.04</b>      | <b>6.94</b> | <b>1.59-30.3</b> | <b>0.01</b>      | <b>5.97</b>         | <b>1.35-26.3</b> | <b>0.018</b>     |
| <b>Variable of Interest</b> | <b>0.53</b>       | <b>0.35-0.81</b> | <b>0.003</b>     | <b>2.03</b> | <b>1.23-3.35</b> | <b>0.005</b>     | <b>1.80</b>         | <b>1.12-2.91</b> | <b>0.01</b>      |

BNP, brain natriuretic peptide; CD, Chagas disease; E, peak early wave diastolic filling velocity; E', peak early diastolic mitral annulus velocity; HR, hazard ratio; LV, left ventricular; PCR, polymerase chain reaction; RV, right ventricular; S', peak systolic mitral annulus velocity; *T. cruzi*, *Trypanosoma cruzi*.
